# Supplementary material for: Construction of covalent organic frameworks via the Mannich reaction at room temperature for light-driven oxidative hydroxylation of arylboronic acids
Source: Royal Society of Chemistry journal article supplement (doi:10.1039/d4sc04358h), 2024-01-01
Supplement: d4sc04358h1.pdf [file d4sc04358h1.pdf]

Supplementary Information for

**Construction of covalent organic frameworks via Mannich reaction at room temperature for light-driven oxidative hydroxylation of Arylboronic acids**

Jian-Cheng Wang<sup>†\*</sup>, Ting Sun<sup>†</sup>, Jun Zhang, Zhi Chen, Jia-Qi Du, Jing-Lan Kan and Yu-Bin Dong\*

College of Chemistry, Chemical Engineering and Materials Science, Collaborative Innovation Centre of Functionalized Probes for Chemical Imaging in Universities of Shandong, Key Laboratory of Molecular and Nano Probes, Ministry of Education, Shandong Normal University, Jinan 250014, P. R. China.

E-mail: wangjiancheng1003@163.com, yubindong@sdu.edu.cn (Y.B. Dong).

<sup>†</sup>These authors contributed equally.

**Contents**

1. General information (page S2)
2. Synthesis and characterization of model compound 1,3-diphenyl-3-(phenylamino) propan-1-one (page S2)
3. Synthesis and characterization of **TAD-COF** (page S3)
4. The product characterization for optimization of reaction conditions for the model oxidation hydroxylation reaction of phenylboronic acid (Table 1) (page S5)
5. Leaching test of **TAD-COF**-catalyzed photo-induced oxidative hydroxylation reaction of phenylboronic acid (page S6)
6. Summary and comparison of the reported metal-free organic porous materials for the photocatalytic oxidative hydroxylation of the arylboronic acids (page S6)
7. Products characterization for the **TAD-COF**-catalyzed photo-induced oxidative hydroxylation reaction (Table 2) (page S7)
8. The ESR experiments (page S12)
9. The quenching experiments (page S12)
10. Synthesis and characterization of **DAT-COF** (page S12)
11. Synthesis and characterization of **TAT-COF** (page S16)
12. Reference (page S19)

## 1. General information

All the chemicals were obtained from commercial sources and used without further purification. All characterization tests were carried out through Analysis and Test Center of College of Chemistry, Chemical Engineering and Materials Science, Shandong Normal University. Infrared (IR) spectra were obtained in the 400-4000  $\text{cm}^{-1}$  range using a Bruker ALPHA FT-IR Spectrometer.  $^1\text{H}$  NMR data were collected on an AM-400 spectrometer. Chemical shifts are reported in  $\delta$  relative to TMS. MS spectra were obtained by Bruker maxis ultra-high resolution-TOF MS system. Thermogravimetric analyses (TGA) were carried out on a TA Instrument Q5 simultaneous TGA under flowing nitrogen at a heating rate of 5  $^\circ\text{C}/\text{min}$ . PXRD patterns were obtained on D8 Advance X-ray powder diffractometer with Cu  $K\alpha$  radiation ( $\lambda = 1.5405 \text{ \AA}$ ). HR-TEM (High Resolution Transmission Electron Microscopy) analyses were performed on a JEOL 2100 Electron Microscope at an operating voltage of 200 kV. The total surface areas of the COFs were measured by the BET (Brunauer Emmer Teller) isotherms using  $\text{N}_2$  adsorption at 77 K and this was done on the Micromeritics ASAP 2020 sorption/desorption analyzer.  $^{13}\text{C}$  CP-MAS solid-state NMR spectra were recorded on a MERCURY plus 400 spectrometers operating at resonance frequencies of 400M Hz and the sample rotation frequency is 8.0-10.2 kHz.  $^{15}\text{N}$  CP-MAS solid-state NMR spectra were recorded on a MERCURY plus 400 spectrometers operating at resonance frequencies of 400M Hz and the sample rotation frequency is 12 kHz. The scanning electron microscopy (SEM) micrographs were recorded on a Gemini Zeiss Supra TM scanning electron microscope equipped with energy-dispersive X-ray detector (EDX). Ultraviolet-visible (UV-vis) absorption spectra were recorded on a Shimadzu UV-2600 Double Beam UV-vis Spectrophotometer. The model of LED lamp is PL-SX100A. Electron paramagnetic resonance (EPR) spectra was measured by Bruker A300 EPR Spectroscopy.

## 2. Synthesis and characterization of model compound 1,3-diphenyl-3-(phenylamino) propan-1-one

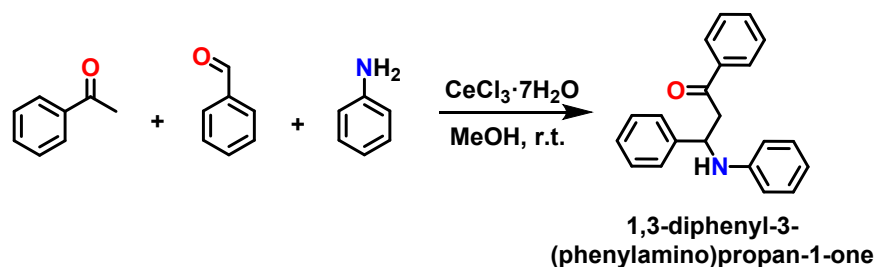

### Scheme S1 Synthesis of 1,3-diphenyl-3-(phenylamino) propan-1-one.

A mixture of acetone (4.0 mmol), benzaldehyde (1.0 mmol) and aniline (1.0 mmol) was stirred at 25  $^\circ\text{C}$  for 0.5 h in methanol (5 mL). Then,  $\text{CeCl}_3 \cdot 7\text{H}_2\text{O}$  (cerium hydrate) (50 mol% as catalyst) was added to the mixture and the mixture was continuously stirred at 25  $^\circ\text{C}$ . The progress of the reaction was monitored by TLC. After reaction, the solvent was removed by vacuum evaporation to afford the crude product and the crude product was purified by recrystallization with ethanol in 86% yield. IR (KBr pellet  $\text{cm}^{-1}$ ): 3385 (s), 3052 (vw), 2918 (vw), 2877 (vw), 671 (vs), 1600 (s), 1510 (s), 1448 (w), 1369 (vw), 1291 (s), 1221 (w), 1176 (vw), 1116 (vw), 1068 (vw), 1002 (vw), 920 (vw), 862 (vw), 768 (w), 748 (s), 701 (s), 689 (s), 622 (w), 579 (w), 543 (w), 510 (w).  $^1\text{H}$  NMR (400 MHz,  $\text{CDCl}_3$ )  $\delta$  7.83 (d,  $J = 8.0$  Hz, 2H), 7.49 (s, 1H), 7.37 (dd,  $J = 10.0, 3.4$  Hz, 4H), 7.24 (d,  $J = 8.0$  Hz, 2H), 7.20-7.12 (m, 2H), 7.02 (s, 2H), 6.61 (s, 1H), 6.51 (d,  $J = 8.0$  Hz, 2H), 4.93 (s, 1H), 3.45 (s, 1H), 3.39 (s, 1H).  $^{13}\text{C}$  NMR (100 MHz,  $\text{CDCl}_3$ )  $\delta$  198.44, 146.58, 142.67, 136.65, 133.47, 129.14, 128.85, 128.73, 128.23, 127.45, 126.48, 118.16, 114.26, 55.12, 46.26. HRMS (ESI,  $m/z$ ) calcd. For  $\text{C}_{21}\text{H}_{19}\text{NO}$   $[\text{M}+\text{H}]^+$ : 302.1537, found 302.1530.

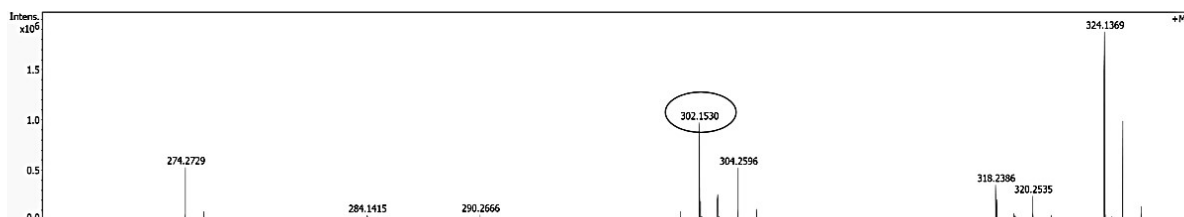

**Fig. S1** HR-MS of 1,3-diphenyl-3-(phenylamino) propan-1-one.

### 3. Synthesis and characterization of TAD-COF

A mixture of 4,4',4''-(1,3,5-triazine-2,4,6-triyl) tribenzaldehyde (TATB) (0.05 mmol, 19.7 mg), acetophenone (0.60 mmol, 70  $\mu$ L) and 4,4'-diaminodiphenyl (0.075 mmol, 13.8 mg) were stirred at 25  $^{\circ}$ C for 30 min in a mixture of methanol (2.6 mL) and acetonitrile (1.3 mL) in a round-bottomed flask. Then, cerium chloride heptahydrate (28.0 mg, 0.075 mmol) was added into the mixture and the mixture was stirred at room temperature for 7 days. The obtained precipitate was collected by centrifugation and washed with N, N-dimethyl formamide, ethanol and ether, respectively. After dried in vacuo overnight, **TAD-COF** was obtained as the yellowish-brown crystalline powder in 75.1% yield (36.8 mg). IR (KBr pellet  $\text{cm}^{-1}$ ): 3385 (w), 3026 (w), 1699 (w), 1670 (w), 1621 (w), 1574 (w), 1511 (vs), 1412 (w), 1361 (s), 1293 (w), 1194 (w), 1104 (vw), 1015 (vw), 810 (s), 742 (vw), 545 (w).

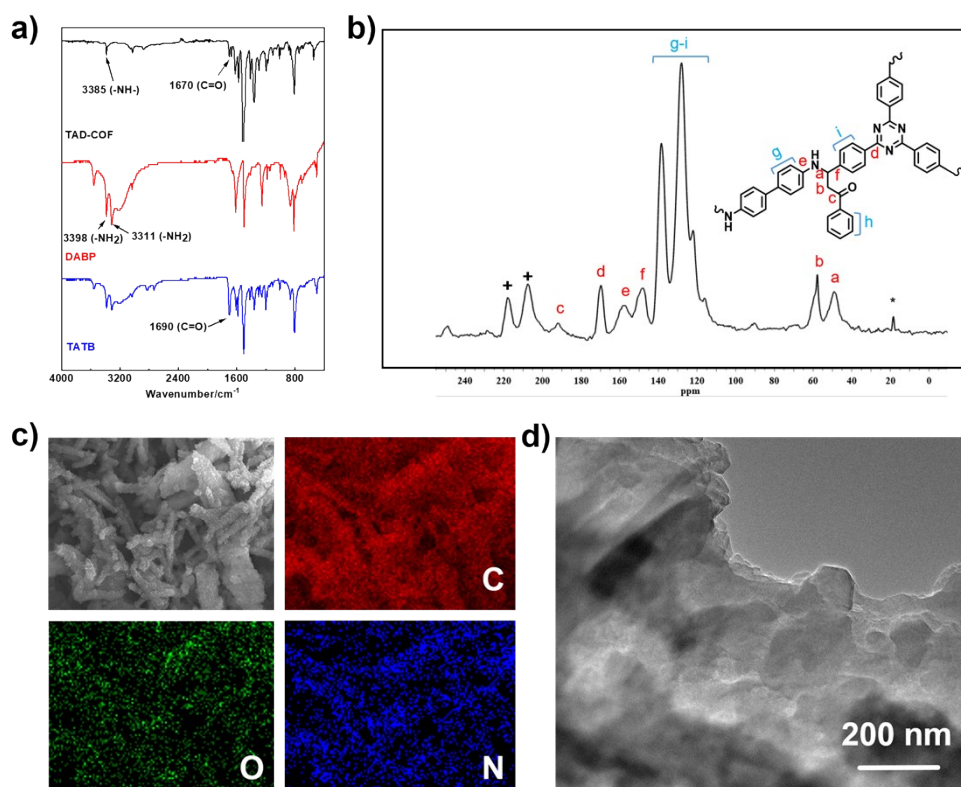

**Fig. S2** a) The FT-IR spectra of **TAD-COF** and its monomers. The Fourier transform infrared (FT-IR) spectra showed all characteristic peaks, such as 1670  $\text{cm}^{-1}$  for  $[-\text{C}=\text{O}]$ , 3385  $\text{cm}^{-1}$  for  $[-\text{NH}-]$  stretching vibrations, which suggested the formation of **TAD-COF** through the Mannich condensation reaction. b) The solid-state  $^{13}\text{C}$ -MAS NMR spectrum of **TAD-COF**,  $\delta$  (ppm): 193.4, 169.7, 157.3, 147.8, 138.4, 128.0, 122.0, 57.7, 49.8. The plus sign may be the unreacted terminal aldehyde carbon signal of COF materials. Asterisks denote spinning sidebands.<sup>1, 2</sup> The formation of **TAD-COF** was verified by the

existence of the keto and aliphatic carbon in **TAD-COF** through the corresponding resonances at 193.4, 57.7, 49.8 ppm, respectively. c) SEM-EDX images of **TAD-COF** d) TEM image of **TAD-COF**.

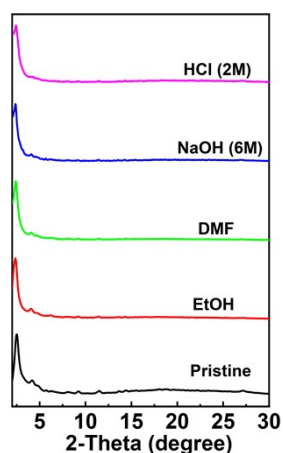

**Fig. S3** Stability examination in different media. The PXRD patterns indicated that the crystallinity and structural integrity of **TAD-COF** were well maintained after it was soaked in different media for 24 h.

**Table S1.** Fractional atomic coordinates for the unit cell of **TAD-COF**

**Py-O-COF** AA stacking mode, space group: *P6*

$$a = b = 42.5183 \text{ \AA}, c = 3.7231 \text{ \AA}$$

$$\alpha = \beta = 90^\circ, \gamma = 120^\circ$$

| Aotm | x       | y        | z       |
|------|---------|----------|---------|
| C1   | 0.29871 | -0.36209 | 0.6554  |
| N2   | 0.32752 | -0.36768 | 0.65478 |
| C3   | 0.26112 | -0.39332 | 0.63423 |
| C4   | 0.23105 | -0.38865 | 0.68833 |
| C5   | 0.19568 | -0.41789 | 0.64941 |
| C6   | 0.18907 | -0.4528  | 0.55303 |
| C7   | 0.21967 | -0.45707 | 0.50205 |
| C8   | 0.25494 | -0.42795 | 0.54427 |
| C9   | 0.14954 | -0.48398 | 0.49918 |
| N10  | 0.12843 | -0.47032 | 0.30728 |
| C11  | 0.14572 | -0.51853 | 0.3136  |
| C12  | 0.14786 | -0.54693 | 0.54155 |
| O13  | 0.17765 | -0.54273 | 0.61612 |
| C14  | 0.11503 | -0.58161 | 0.64671 |
| C15  | 0.09158 | -0.48052 | 0.39269 |
| C16  | 0.08389 | -0.4546  | 0.5358  |

|     |         |          |         |
|-----|---------|----------|---------|
| C17 | 0.04791 | -0.46245 | 0.57415 |
| C18 | 0.01897 | -0.4964  | 0.46804 |
| C19 | 0.02678 | -0.52245 | 0.32939 |
| C20 | 0.0627  | -0.51431 | 0.28628 |
| C21 | 0.0808  | -0.58431 | 0.67813 |
| C22 | 0.05038 | -0.61691 | 0.78204 |
| C23 | 0.05371 | -0.64728 | 0.85644 |
| C24 | 0.08752 | -0.64502 | 0.82859 |
| C25 | 0.11803 | -0.6124  | 0.72557 |
| H26 | 0.4824  | 0.69973  | 1.42239 |
| H27 | 0.23478 | -0.36226 | 0.75762 |
| H28 | 0.17346 | -0.41268 | 0.68397 |
| H29 | 0.27748 | -0.43251 | 0.49677 |
| H30 | 0.13645 | -0.49265 | 0.7558  |
| H31 | 0.14226 | -0.44718 | 0.14892 |
| H32 | 0.16697 | -0.50961 | 0.10721 |
| H33 | 0.11946 | -0.53269 | 0.17418 |
| H34 | 0.10586 | -0.42802 | 0.61055 |
| H35 | 0.04269 | -0.44182 | 0.68138 |
| H36 | 0.00516 | -0.54835 | 0.2336  |
| H37 | 0.0676  | -0.53378 | 0.15039 |
| H38 | 0.07771 | -0.56101 | 0.63423 |
| H39 | 0.02427 | -0.6185  | 0.80803 |
| H40 | 0.03015 | -0.67249 | 0.93818 |
| H41 | 0.09012 | -0.66852 | 0.88806 |
| H42 | 0.14395 | -0.61134 | 0.70564 |

#### 4. The product characterization for optimization of reaction conditions for the model oxidation hydroxylation reaction of phenylboronic acid (Table 1)

In oxygen, a mixture of phenylboronic acid (0.50 mmol), DIPEA (N, N-diisopropylethylamine), TAD-COF (7-15 mg), and solvent (2.5 mL) was stirred at 25 °C under blue LED (460 nm, 40 mW/cm<sup>2</sup>) irradiation. TLC (thin-layer chromatography) was used to monitor the reaction progress. After completion of the reaction, the catalyst was recovered by centrifugation and the obtained crude products were purified by column on silica gel using dichloromethane and methanol as eluent to provide the corresponding products. The product was characterized by <sup>13</sup>H NMR, <sup>13</sup>C NMR and HRMS

measurements.

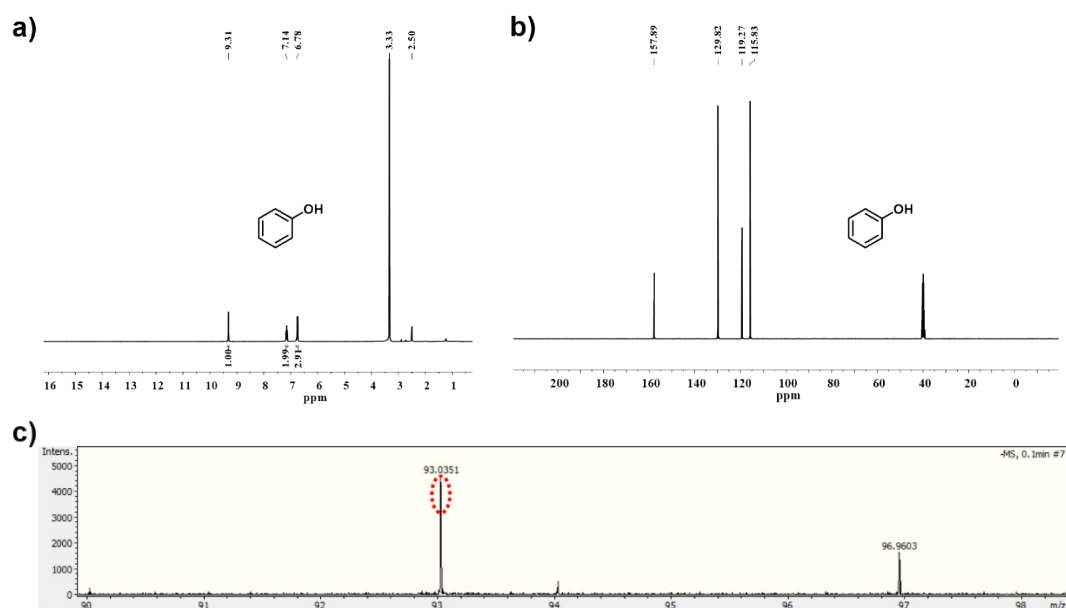

**Fig. S4** (a)  $^1\text{H}$  NMR spectrum of the model reaction product.  $^1\text{H}$  NMR (400 MHz,  $\text{DMSO-}d_6$ )  $\delta$  9.31 (s, 1H), 7.14 (s, 2H), 6.78 (s, 3H). (b)  $^{13}\text{C}$  NMR spectrum of the model reaction product.  $^{13}\text{C}$  NMR (101 MHz,  $\text{DMSO-}d_6$ )  $\delta$  157.89, 129.82, 119.27, 115.83. (c) MS spectrum of the model reaction product. HRMS (ESI):  $m/z$   $[\text{M-H}]^-$ , Calcd for  $\text{C}_6\text{H}_5\text{O}^-$  93.0349, found 93.0351.

## 5. Leaching test of TAD-COF-catalyzed photo-induced oxidative hydroxylation reaction of phenylboronic acid

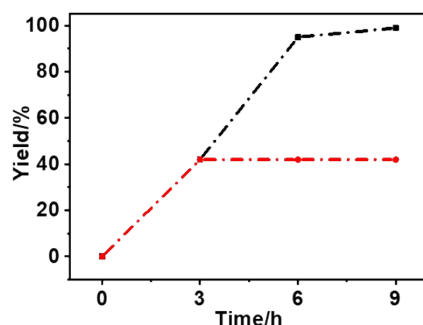

**Fig. S5** Reaction time examination (black line) and leaching test (red line). The solid catalyst was filtrated from the reaction solution after 3 h, and the filtrate was transferred to a new vial and the reaction was carried out under the same conditions for an additional 6 h.

## 6. Summary and comparison of the reported metal-free organic porous materials for the photocatalytic oxidative hydroxylation of the arylboronic acids

**Table S2.** Summary and comparison of the reported metal-free organic porous materials for the photocatalytic oxidative hydroxylation of the arylboronic acids

| Catalyst    | Light Source      | T/°C | Time/h | Oxidant      | Yield/% | Ref. |
|-------------|-------------------|------|--------|--------------|---------|------|
| PCP-MF      | white LEDs        | 25   | 10     | $\text{O}_2$ | 94      | 3    |
| Cz-POF-1    | fluorescence lamp | 25   | 24     | air          | 94      | 4    |
| LZU-190-COF | white LEDs        | 25   | 48     | air          | 99      | 1    |

|                |                    |           |          |                      |           |                  |
|----------------|--------------------|-----------|----------|----------------------|-----------|------------------|
| BBO-COF        | white LEDs         | 25        | 48       | air                  | 99        | 5                |
| TFB-BMTH-COF   | white LEDs         | 25        | 24       | O <sub>2</sub>       | 99        | 6                |
| Cy-N3-COF      | blue LEDs          | 25        | 6        | O <sub>2</sub>       | 99        | 7                |
| <b>TAD-COF</b> | <b>460 nm LEDs</b> | <b>25</b> | <b>9</b> | <b>O<sub>2</sub></b> | <b>99</b> | <b>This work</b> |

## 7. Products characterization for the TAD-COF-catalyzed photo-induced oxidative hydroxylation reaction (Table 2)

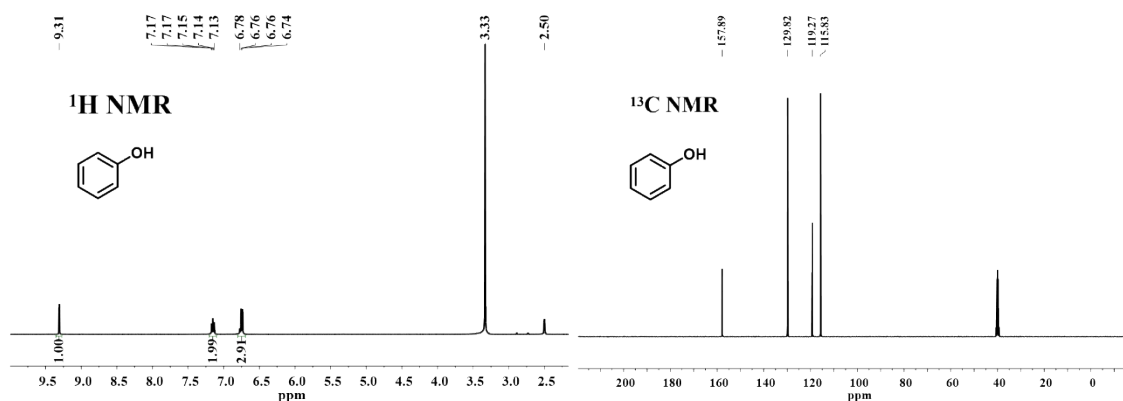

**Phenol (2a):** The product is isolated by column chromatography on silica gel as white solid (46.5 mg, isolated yield: 99%). <sup>1</sup>H NMR (400 MHz, DMSO-*d*<sub>6</sub>) δ 9.31 (s, 1H), 7.15 (m, 2H), 6.76 (dd, *J*=8.0 Hz, 3H). <sup>13</sup>C NMR (101 MHz, DMSO-*d*<sub>6</sub>) δ 157.8, 129.8, 119.2, 115.8. HRMS (ESI) *m/z* [M-H]<sup>-</sup> calcd for C<sub>6</sub>H<sub>5</sub>O<sup>-</sup> 93.0349, found 93.0351.

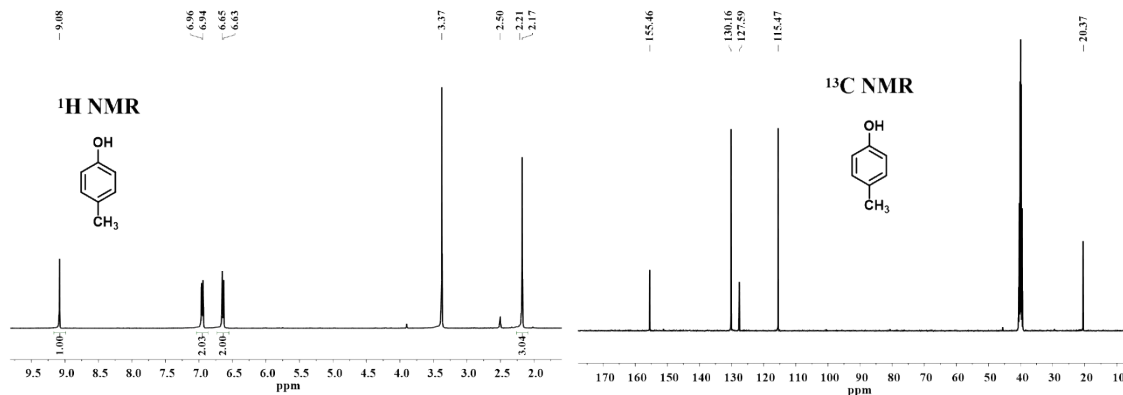

**p-Cresol (2b):** The product is isolated by column chromatography on silica gel as colorless liquid (44.7 mg, isolated yield: 83%). <sup>1</sup>H NMR (400 MHz, DMSO-*d*<sub>6</sub>) δ 9.08 (s, 1H), 6.95 (d, *J*=8.0 Hz, 2H), 6.62 (d, *J*=8.0 Hz, 2H), 2.19 (s, 3H). <sup>13</sup>C NMR (101 MHz, DMSO-*d*<sub>6</sub>) δ 155.4, 130.1, 127.5, 115.4, 20.3. HRMS (ESI) *m/z* [M-H]<sup>-</sup> calcd for C<sub>7</sub>H<sub>7</sub>O<sup>-</sup> 107.0505, found 107.0501.

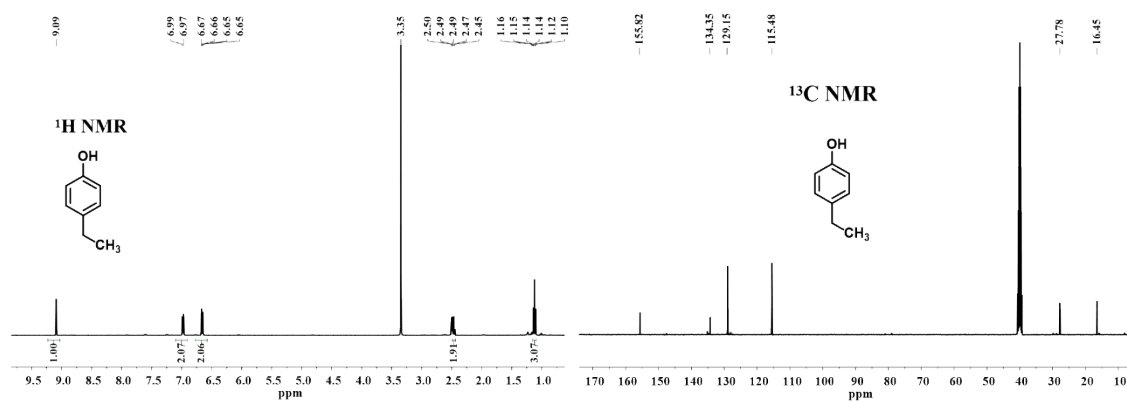

**4-Ethylphenol (2c):** The product is isolated by column chromatography on silica gel as colorless liquid (55.3 mg, isolated yield: 91%).  $^1\text{H}$  NMR (400 MHz,  $\text{DMSO-}d_6$ )  $\delta$  9.09 (s, 1H), 6.98 (d,  $J=8.0$  Hz, 2H), 6.66 (d,  $J=8.0$  Hz, 2H), 2.46 (t,  $J=8.0$  Hz, 2H), 1.15 (d, 3H).  $^{13}\text{C}$  NMR (101 MHz,  $\text{DMSO-}d_6$ )  $\delta$  155.8, 134.3, 129.1, 115.4, 27.7, 16.4. HRMS (ESI)  $m/z$   $[\text{M-H}]^-$  calcd for  $\text{C}_8\text{H}_9\text{O}^-$  121.0662, found 121.0632.

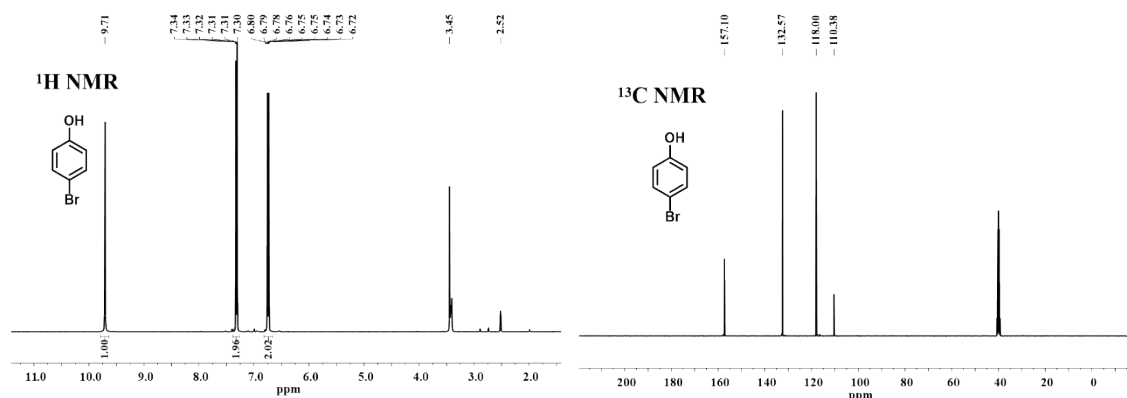

**4-Bromophenol (2d):** The product is isolated by column chromatography on silica gel as brown solid (83.1 mg, isolated yield: 97%).  $^1\text{H}$  NMR (400 MHz,  $\text{DMSO-}d_6$ )  $\delta$  9.71 (s, 1H), 7.32 (m, 2H), 6.76 (m, 2H).  $^{13}\text{C}$  NMR (101 MHz,  $\text{DMSO-}d_6$ )  $\delta$  157.1, 132.5, 118.0, 110.3. HRMS (ESI)  $m/z$   $[\text{M-H}]^-$  calcd for  $\text{C}_6\text{H}_4\text{BrO}^-$  170.9454, found 170.9425.

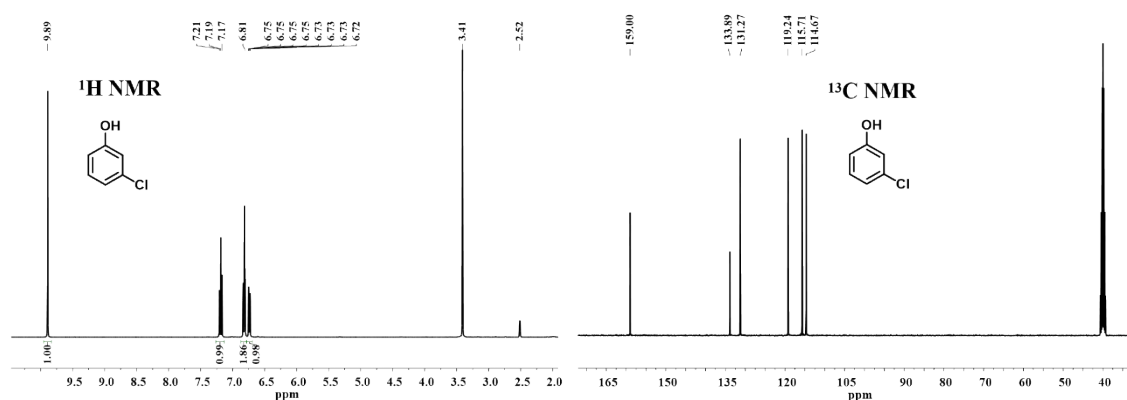

**3-Chlorophenol (2e):** The product is isolated by column chromatography on silica gel as white solid (61.3 mg, isolated yield: 96%).  $^1\text{H}$  NMR (400 MHz,  $\text{DMSO-}d_6$ )  $\delta$  9.89 (s, 1H), 7.27–7.11 (m, 1H), 6.86–6.79 (m, 2H), 6.74 (dd,  $J=8.0$  Hz, 1H).  $^{13}\text{C}$  NMR (101 MHz,  $\text{DMSO-}d_6$ )  $\delta$  159.0, 133.8, 131.2, 119.2, 115.7, 114.6. HRMS (ESI)  $m/z$   $[\text{M-H}]^-$  calcd for  $\text{C}_6\text{H}_4\text{ClO}^-$  126.9959, found 126.9940.



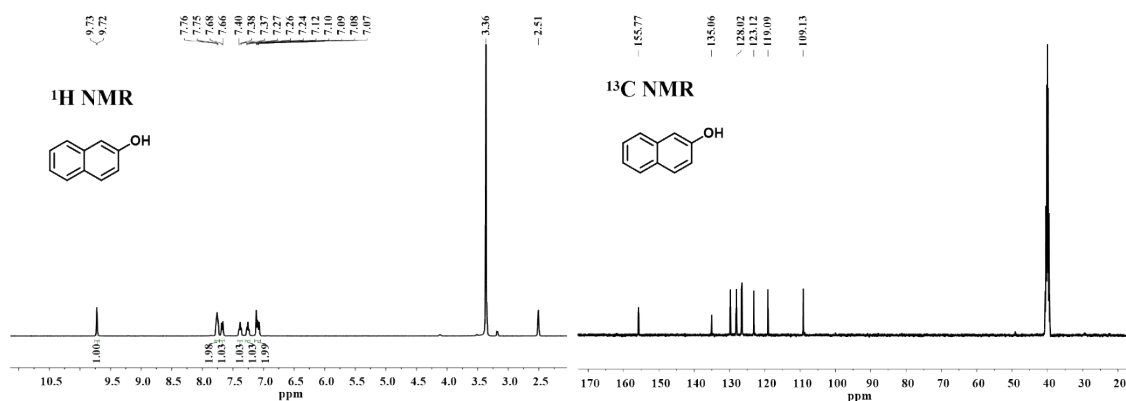

**Naphthalen-2-ol (2f):** The product is isolated by column chromatography on silica gel as yellow solid (69.1 mg, isolated yield: 96%).  $^1\text{H NMR}$  (400 MHz,  $\text{DMSO-}d_6$ )  $\delta$  9.72 (d, 1H), 7.75 (d,  $J=8.0$  Hz, 2H), 7.67 (d,  $J=8.0$  Hz, 1H), 7.38 (t,  $J=8.0$  Hz, 1H), 7.26 (t,  $J=8.0$  Hz, 1H), 7.15–7.05 (m, 2H).  $^{13}\text{C NMR}$  (101 MHz,  $\text{DMSO-}d_6$ )  $\delta$  155.7, 135.0, 129.7, 128.2, 128.0, 126.5, 126.4, 123.1, 119.0, 109.1. HRMS (ESI)  $m/z$   $[\text{M-H}]^-$  calcd for  $\text{C}_{10}\text{H}_7\text{O}^-$  143.0505, found 143.0475.

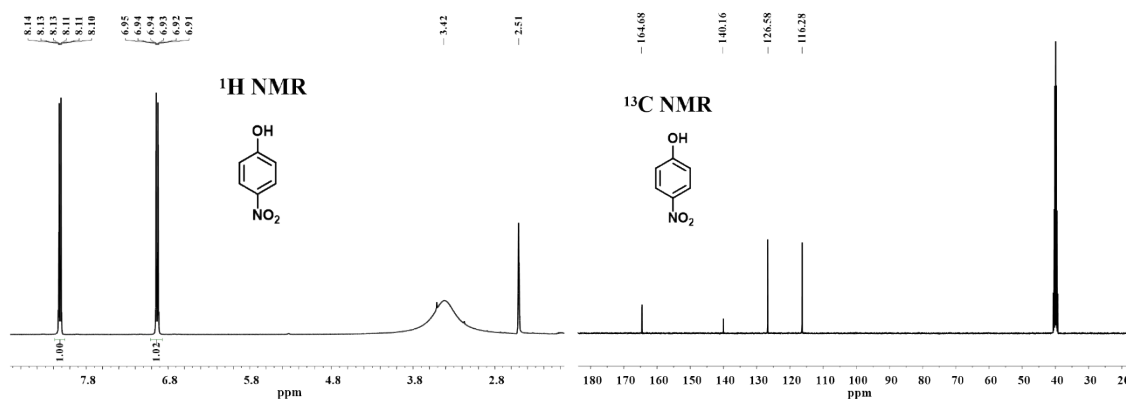

**4-Nitrophenol (2g):** The product is isolated by column chromatography on silica gel as yellow solid (67.4 mg, isolated yield: 97%).  $^1\text{H NMR}$  (400 MHz,  $\text{DMSO-}d_6$ )  $\delta$  8.13 (d,  $J=8.0$  Hz, 2H), 6.93 (d,  $J=8.0$  Hz, 2H).  $^{13}\text{C NMR}$  (101 MHz,  $\text{DMSO-}d_6$ )  $\delta$  164.6, 140.1, 126.5, 116.2. HRMS (ESI)  $m/z$   $[\text{M-H}]^-$  calcd for  $\text{C}_6\text{H}_4\text{NO}_3^-$  138.0191, found 138.0131.

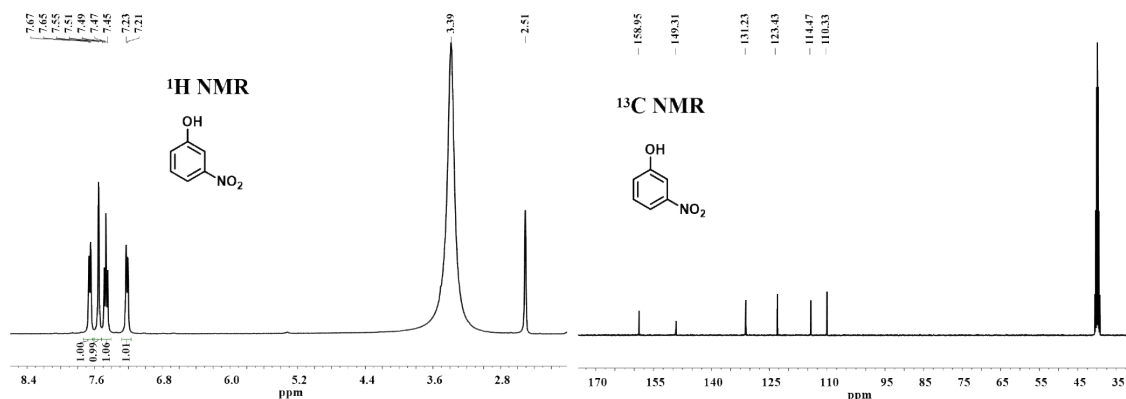

**3-Nitrophenol (2h):** The product is isolated by column chromatography on silica gel as yellow solid (66.7 mg, isolated yield: 96%).  $^1\text{H NMR}$  (400 MHz,  $\text{DMSO-}d_6$ )  $\delta$  7.66 (d,  $J=8.0$  Hz, 1H), 7.53 (d,  $J=8.4$  Hz, 1H), 7.47 (t,  $J=8.2$  Hz, 1H), 7.22 (d,  $J=6.8$  Hz, 1H).  $^{13}\text{C NMR}$  (101 MHz,  $\text{DMSO-}d_6$ )  $\delta$  158.9, 149.3, 131.2, 123.4, 114.4, 110.3. HRMS (ESI)  $m/z$   $[\text{M-H}]^-$  calcd for  $\text{C}_6\text{H}_4\text{NO}_3^-$  138.0191, found 138.0127.

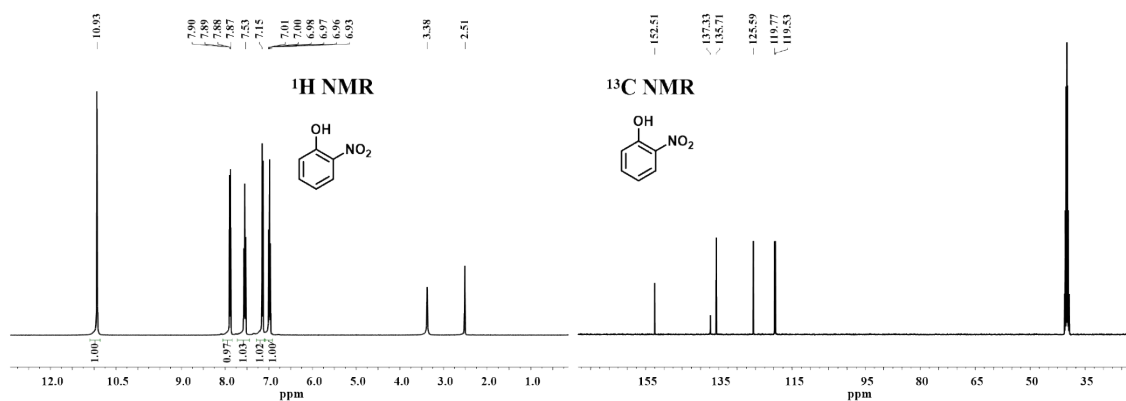

**2-Nitrophenol (2i):** The product is isolated by column chromatography on silica gel as yellow solid (62.4 mg, isolated yield: 90%).  $^1\text{H NMR}$  (400 MHz,  $\text{DMSO-}d_6$ )  $\delta$  10.93 (s, 1H), 7.89 (dd,  $J=8.4$ , 1H), 7.55 (dd,  $J=8.8$  Hz, 1H), 7.22–7.10 (m, 1H), 6.98 (dt,  $J=7.8$  Hz, 1H).  $^{13}\text{C NMR}$  (101 MHz,  $\text{DMSO-}d_6$ )  $\delta$  152.5, 137.3, 135.7, 125.5, 119.7, 119.5. HRMS (ESI)  $m/z$   $[\text{M-H}]^-$  calcd for  $\text{C}_6\text{H}_4\text{NO}_3^-$  138.0191, found 138.0115.

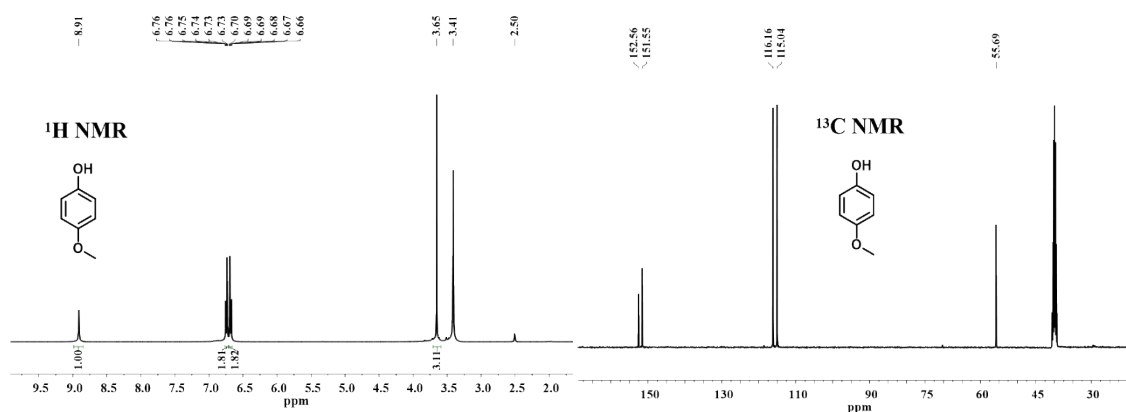

**4-Methoxyphenol (2j):** The product is isolated by column chromatography on silica gel as yellow solid (58.2 mg, isolated yield: 94%).  $^1\text{H NMR}$  (400 MHz,  $\text{DMSO-}d_6$ )  $\delta$  8.91 (s, 1H), 6.77–6.72 (m, 2H), 6.71–6.65 (m, 2H), 3.70–3.60 (m, 3H).  $^{13}\text{C NMR}$  (101 MHz,  $\text{DMSO-}d_6$ )  $\delta$  152.5, 151.5, 116.1, 115.0, 55.6. HRMS (ESI)  $m/z$   $[\text{M-H}]^-$  calcd for  $\text{C}_7\text{H}_7\text{O}_2^-$  123.0454, found 123.0428.

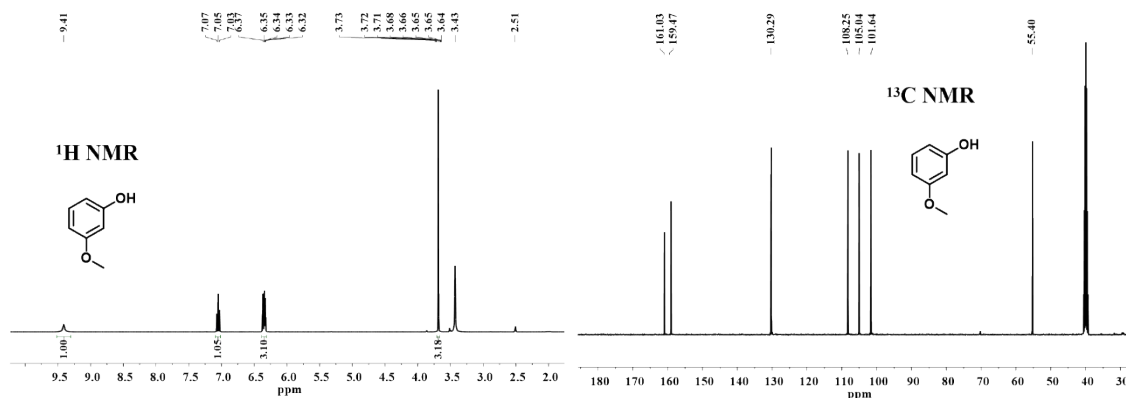

**3-Methoxyphenol (2k):** The product is isolated by column chromatography on silica gel as yellow solid (54.2 mg, isolated yield: 88%).  $^1\text{H NMR}$  (400 MHz,  $\text{DMSO-}d_6$ )  $\delta$  9.41 (s, 1H), 7.11–6.99 (m, 1H), 6.42–6.30 (m, 3H), 3.75–3.64 (m, 3H).  $^{13}\text{C NMR}$  (101 MHz,  $\text{DMSO-}d_6$ )  $\delta$  161.0, 159.4, 130.2, 108.2, 105.0, 101.6, 55.4. HRMS (ESI)  $m/z$   $[\text{M-H}]^-$  calcd for  $\text{C}_7\text{H}_7\text{O}_2^-$  123.0454, found 123.0418.

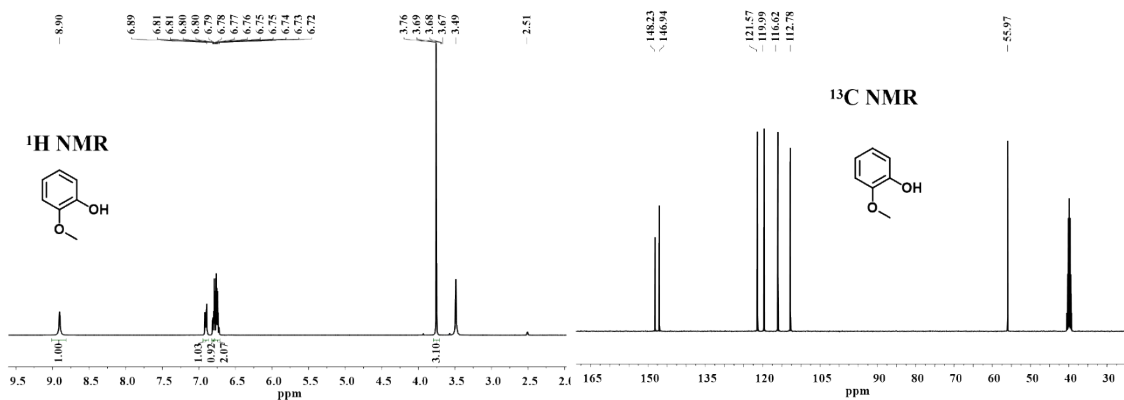

**2-Methoxyphenol (2I):** The product is isolated by column chromatography on silica gel as yellow solid (55.1 mg, isolated yield: 89%).  $^1\text{H NMR}$  (400 MHz,  $\text{DMSO-}d_6$ )  $\delta$  8.90 (s, 1H), 6.93–6.88 (m, 1H), 6.82–6.79 (m, 1H), 6.75 (qd,  $J=7.4$  Hz, 2H), 3.88–3.64 (m, 3H).  $^{13}\text{C NMR}$  (101 MHz,  $\text{DMSO-}d_6$ )  $\delta$  148.2, 146.9, 121.5, 119.9, 116.6, 112.7, 55.9. HRMS (ESI)  $m/z$   $[\text{M-H}]^-$  calcd for  $\text{C}_7\text{H}_7\text{O}_2^-$  123.0454, found 123.0409.

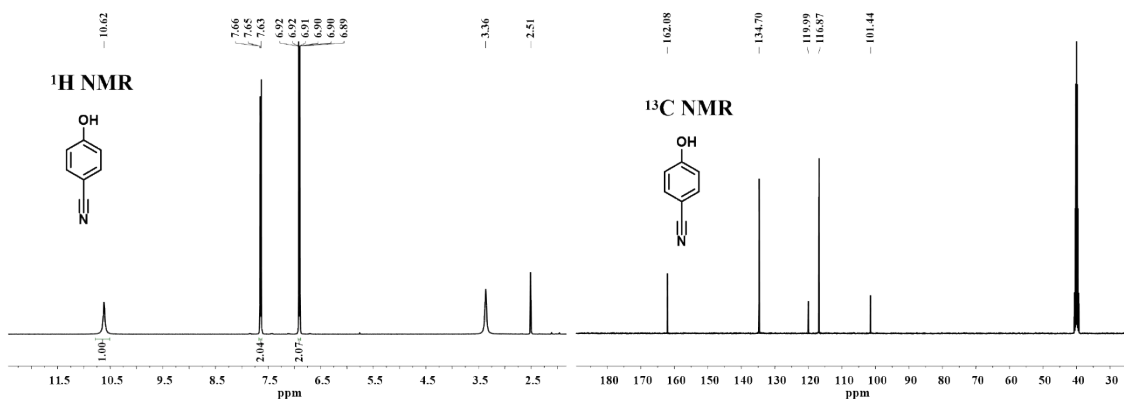

**4-Cyanophenol (2m):** The product is isolated by column chromatography on silica gel as white solid (56.5 mg, isolated yield: 95%).  $^1\text{H NMR}$  (400 MHz,  $\text{DMSO-}d_6$ )  $\delta$  10.62 (s, 1H), 7.65 (d,  $J=12.0$  Hz, 2H), 6.91 (d,  $J=12.0$  Hz, 2H).  $^{13}\text{C NMR}$  (101 MHz,  $\text{DMSO-}d_6$ )  $\delta$  162.0, 134.7, 119.9, 116.8, 101.4. HRMS (ESI)  $m/z$   $[\text{M-H}]^-$  calcd for  $\text{C}_7\text{H}_4\text{NO}^-$  118.0301, found 118.0290.

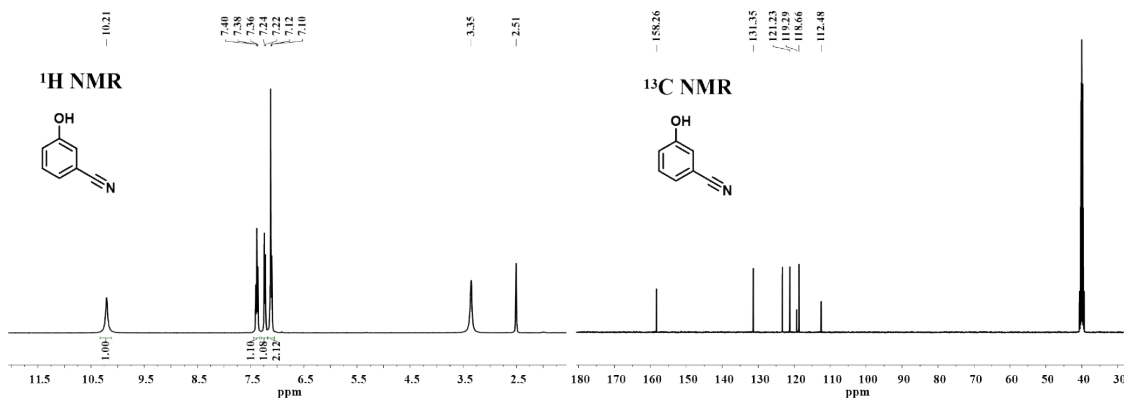

**3-Cyanophenol (2n):** The product is isolated by column chromatography on silica gel as white solid (54.5 mg, isolated yield: 92%).  $^1\text{H NMR}$  (400 MHz,  $\text{DMSO-}d_6$ )  $\delta$  10.21 (s, 1H), 7.38 (t,  $J=7.8$  Hz, 1H), 7.23 (d,  $J=7.6$  Hz, 1H), 7.11 (d,  $J=8.2$  Hz, 2H).  $^{13}\text{C NMR}$  (101 MHz,  $\text{DMSO-}d_6$ )  $\delta$  158.2, 131.3, 123.2, 121.2, 119.2, 118.6, 112.4. HRMS (ESI)  $m/z$   $[\text{M-H}]^-$  calcd for  $\text{C}_7\text{H}_4\text{NO}^-$  118.0301, found 118.0323.

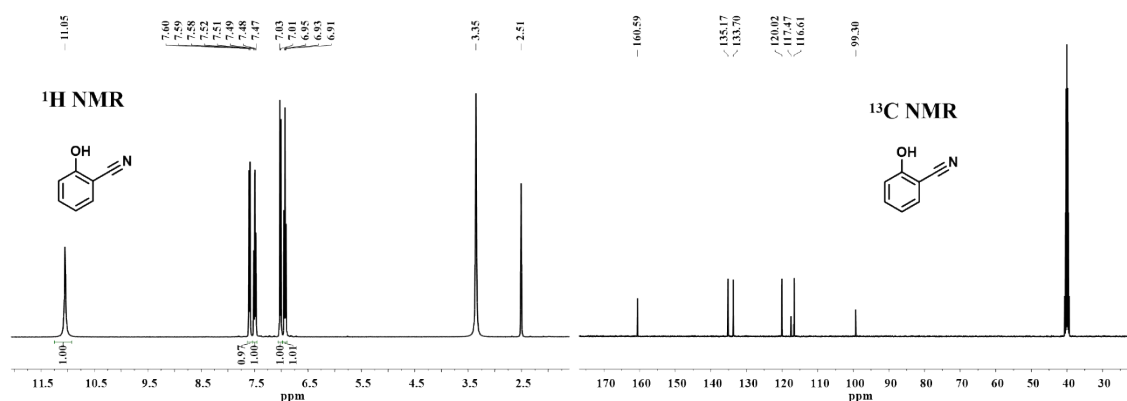

**2-Cyanophenol (2o):** The product is isolated by column chromatography on silica gel as white solid (57.1 mg, isolated yield: 96%).  $^1\text{H NMR}$  (400 MHz,  $\text{DMSO-}d_6$ )  $\delta$  11.05 (s, 1H), 7.60 (dd,  $J=7.8$  Hz, 1H), 7.55–7.44 (m, 1H), 7.02 (d,  $J=8.4$  Hz, 1H), 6.93 (t,  $J=7.6$  Hz, 1H).  $^{13}\text{C NMR}$  (101 MHz,  $\text{DMSO-}d_6$ )  $\delta$  160.5, 135.1, 133.7, 120.0, 117.4, 116.6, 99.3. HRMS (ESI)  $m/z$   $[\text{M-H}]^-$  calcd for  $\text{C}_7\text{H}_4\text{NO}^-$  118.0301, found 118.0293.

## 8. The ESR experiments

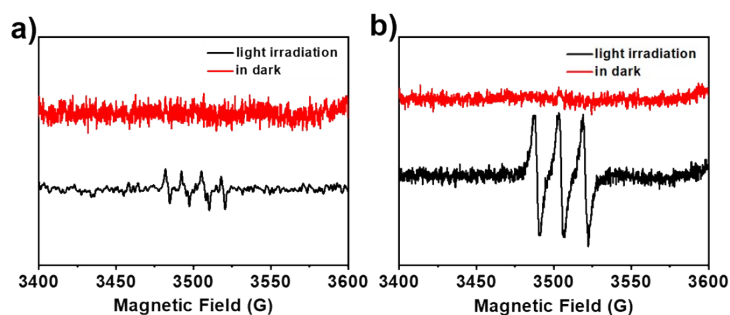

**Fig. S6** a) ESR spectrum of the solution of **TAD-COF** (5 mg), DIPEA (5  $\mu\text{L}$ ) and DMPO (5  $\mu\text{L}$ ) in  $\text{O}_2$  atmosphere in  $\text{CH}_3\text{CN}$  (90  $\mu\text{L}$ ) in dark (red) and upon irradiation with blue LEDs light for 30 s (black). b) ESR spectrum of the solution of **TAD-COF** (5 mg), DIPEA (5  $\mu\text{L}$ ) and TEMP (5  $\mu\text{L}$ ) in  $\text{CH}_3\text{CN}$  (90  $\mu\text{L}$ ) in dark (red) and upon irradiation with blue LEDs light for 30 s (black).

## 9. The quenching experiments

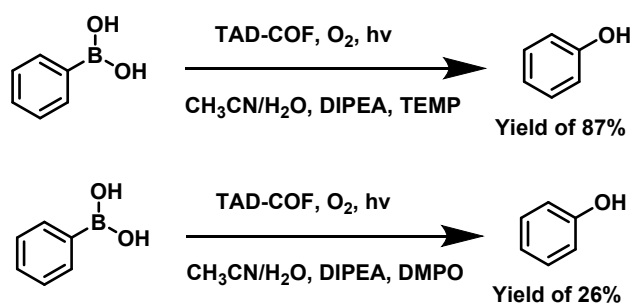

**Scheme S2** The quenching experiments using TEMP and DMPO as the scavengers.

## 10. Synthesis and characterization of DAT-COF

A mixture of 2,5-dimethoxyterephthalaldehyde (DMTP) (0.075 mmol, 14.6 mg), acetophenone (0.60 mmol, 70  $\mu\text{L}$ ) and 1,3,5-tris(4-aminophenyl) benzene (TAPB) (0.05 mmol, 17.6 mg) were stirred at 25  $^\circ\text{C}$

for 30 min in a mixture of methanol (2.0 mL), acetonitrile (0.5 mL) and chloroform (1.5 mL) in a round-bottomed flask. Then, cerium chloride heptahydrate (28.0 mg, 0.075 mmol) was added into the mixture and the mixture was stirred at room temperature for 7 days. The obtained precipitate was collected by centrifugation and washed with N, N-dimethyl formamide, ethanol and ether, respectively. The collected solid was then dried in vacuo overnight to yield **DAT-COF** (39.0 mg, 81.8% yield). IR (KBr pellet  $\text{cm}^{-1}$ ): 3374 (vw), 2936 (vw), 2832 (vw), 1669 (w), 1615 (s), 1593 (s), 1506 (s), 1487 (s), 1465 (s), 1409 (vs), 1289 (s), 1211 (vs), 1181 (vw), 1144 (vw), 1038 (s), 879 (vw), 829 (s), 694 (w).

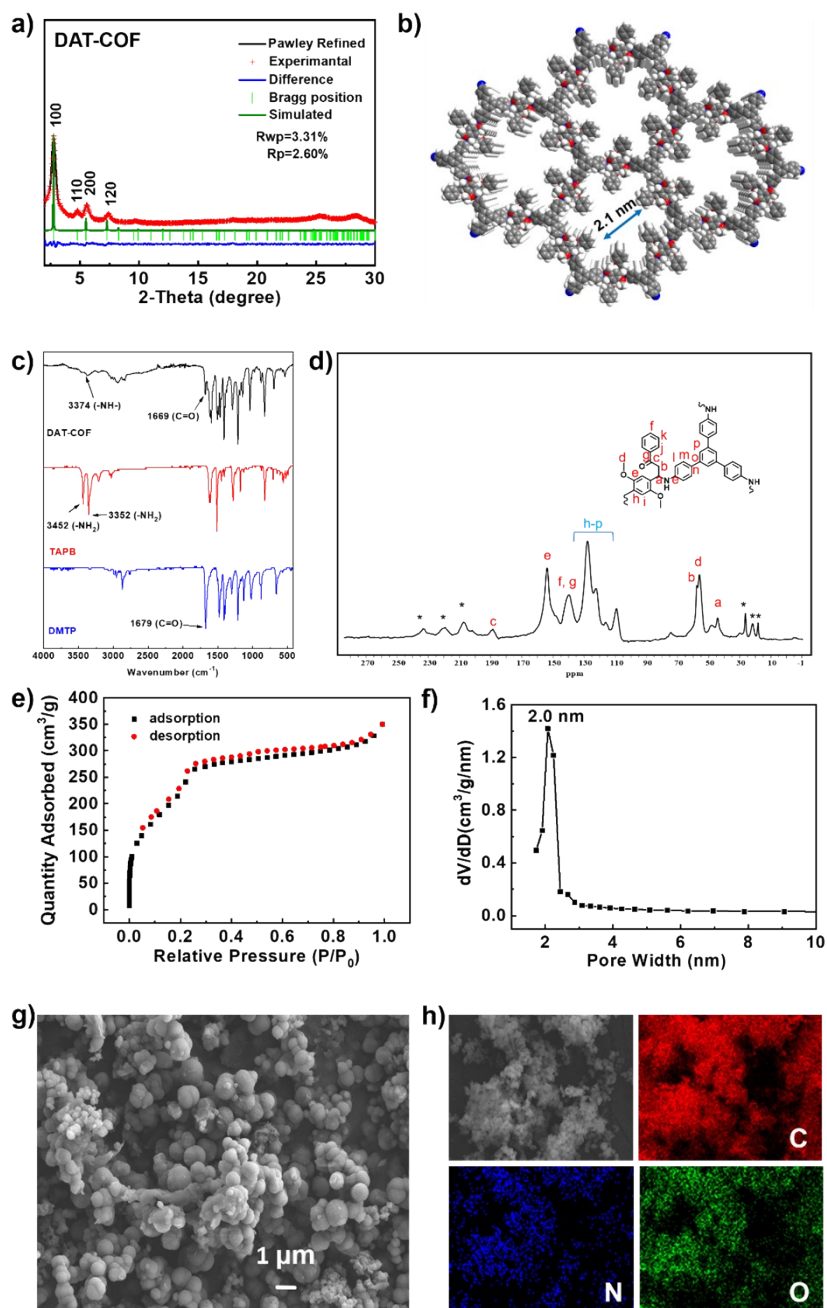

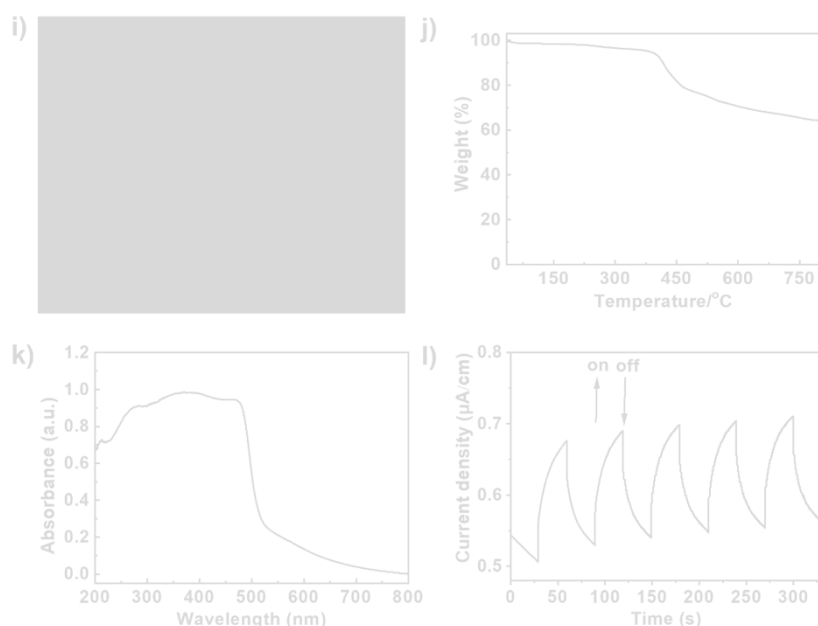

**Fig. S7** a) PXR D patterns of **DAT-COF** (AA stacking). b) The top and side views of **DAT-COF** (AA stacking). c) The FT-IR spectra of **DAT-COF** and its part monomers. The FT-IR spectra showed the characteristic peaks such as  $1669\text{ cm}^{-1}$  for  $[-\text{C}=\text{O}]$ ,  $3374\text{ cm}^{-1}$  for  $[-\text{N}-\text{H}]$  stretching vibrations, which suggested the formation of **DAT-COF** through Mannich condensation reaction. d) The solid-state  $^{13}\text{C}$ -MAS NMR spectrum of **DAT-COF**,  $\delta$  (ppm): 188.7, 153.7, 139.7, 127.7, 122.2, 109.2, 57.8, 57.5, 44.8. The formation of **DAT-COF** was verified by the existence of the keto and aliphatic carbon in **DAT-COF** through the corresponding resonances at 188.7, 57.8, 57.5, 44.8 ppm, respectively. e)  $\text{N}_2$  adsorption isotherms for **DAT-COF** at 77 K.  $\text{N}_2$  adsorption at 77 K revealed absorption amounts of **DAT-COF** was  $350.0\text{ cm}^3/\text{g}$ , and its surface areas calculated on basis of the BET model were determined as  $935.0\text{ m}^2/\text{g}$ . f) Pore size distribution curve of **DAT-COF**. Pore size distribution curves, calculated from nonlocal density functional theory (NLDFT) analysis, showed that the pore width of **DAT-COF** was centered at  $\sim 2.0\text{ nm}$ . g) SEM image of **DAT-COF**. h) SEM-EDX images of **DAT-COF**. i) TEM image of the **DAT-COF**. j) TGA trace of **DAT-COF** measured under nitrogen flow with a heating rate  $10\text{ }^\circ\text{C}/\text{min}$  up to  $800\text{ }^\circ\text{C}$ , which can be stable up to  $400\text{ }^\circ\text{C}$ . k) UV-Vis curve of the **DAT-COF** measured in solid state. **DAT-COF** exhibited an absorption maximum at around  $365\text{ nm}$  with an absorbance edge at  $700\text{ nm}$ . l) Photocurrent response of **DAT-COF**.

**Table S3.** Fractional atomic coordinates for the unit cell of **DAT-COF**

**DAT-COF** AA stacking mode, space group:  $P6$

$$a = b = 37.0976\text{ \AA}, c = 3.5871\text{ \AA}$$

$$\alpha = \beta = 90^\circ, \gamma = 120^\circ$$

| Aotm | x       | y        | z        |
|------|---------|----------|----------|
| C1   | 0.35742 | -0.28929 | -0.23999 |
| C2   | 0.30964 | -0.37666 | -0.2337  |
| C3   | 0.24302 | -0.37418 | -0.28998 |
| C4   | 0.22061 | -0.35419 | -0.1877  |
| C5   | 0.17851 | -0.37155 | -0.2776  |

|     |          |          |          |
|-----|----------|----------|----------|
| C6  | 0.15719  | -0.41015 | -0.45821 |
| C7  | 0.17863  | -0.43129 | -0.54065 |
| C8  | 0.2209   | -0.41349 | -0.46307 |
| N9  | 0.11562  | -0.42679 | -0.60067 |
| C10 | 0.08212  | -0.42038 | -0.45164 |
| C11 | 0.09071  | -0.37569 | -0.57033 |
| C12 | 0.03935  | -0.46151 | -0.48151 |
| C13 | 0.00117  | -0.46226 | -0.46132 |
| C14 | 0.03745  | -0.50056 | -0.43634 |
| C15 | 0.05673  | -0.36808 | -0.70785 |
| C16 | 0.0532   | -0.33185 | -0.58341 |
| O17 | 0.03257  | -0.3909  | -0.94113 |
| C18 | 0.08875  | -0.29351 | -0.49749 |
| C19 | 0.08477  | -0.25947 | -0.38913 |
| C20 | 0.04544  | -0.26325 | -0.3664  |
| C21 | 0.00999  | -0.30106 | -0.45338 |
| C22 | 0.01379  | -0.33517 | -0.56272 |
| O23 | 0.07438  | -0.50108 | -0.34796 |
| C24 | 0.07225  | -0.53788 | -0.20079 |
| H25 | 0.29132  | -0.41007 | -0.23698 |
| H26 | 0.23529  | -0.32493 | -0.03926 |
| H27 | 0.16354  | -0.35399 | -0.21182 |
| H28 | 0.16296  | -0.46089 | -0.68483 |
| H29 | 0.2362   | -0.42993 | -0.56165 |
| H30 | 0.10791  | -0.44838 | -0.81556 |
| H31 | 0.08601  | -0.41741 | -0.15577 |
| H32 | 0.11656  | -0.362   | -0.77084 |
| H33 | 0.10504  | -0.35446 | -0.33381 |
| H34 | 0.11963  | -0.28947 | -0.52137 |
| H35 | 0.11223  | -0.23007 | -0.32375 |
| H36 | 0.04244  | -0.23687 | -0.28169 |
| H37 | -0.02047 | -0.30395 | -0.43643 |

|     |          |          |          |
|-----|----------|----------|----------|
| H38 | -0.01405 | -0.36421 | -0.62999 |
| H39 | 0.10284  | -0.52951 | -0.07682 |
| H40 | 0.06549  | -0.56125 | -0.42105 |
| H41 | 0.04822  | -0.55173 | 0.01789  |
| H42 | 0.00059  | -0.43409 | -0.44094 |

## 11. Synthesis and characterization of TAT-COF

A mixture of 4,4',4''-(1,3,5-triazine-2,4,6-triyl) tribenzaldehyde (TATB) (0.05 mmol, 19.7 mg), acetophenone (0.60 mmol, 70  $\mu$ L) and 1,3,5-tris(4-aminophenyl) benzene (TAPB) (0.05 mmol, 17.6 mg) were stirred at 25  $^{\circ}$ C for 30 min in a mixture of methanol (2.0 mL) and chloroform (2.0 mL) in a round-bottomed flask. Then, cerium chloride heptahydrate (28.0 mg, 0.075 mmol) was added into the mixture and the mixture was stirred at room temperature for 7 days. The obtained precipitate was collected by centrifugation and washed with N, N-dimethyl formamide, ethanol and ether, respectively. The collected solid was then dried in vacuo overnight to yield **TAT-COF** (48.4 mg, 91.7% yield). IR (KBr pellet  $\text{cm}^{-1}$ ): 3384 (w), 3026 (w), 1700 (w), 1670 (w), 1596 (w), 1576 (w), 1515 (vs), 1447 (vw), 1413 (w), 1367 (s), 1293 (w), 1198 (w), 1105 (vw), 1014 (w), 810 (s), 742 (w), 688 (w), 548 (w).

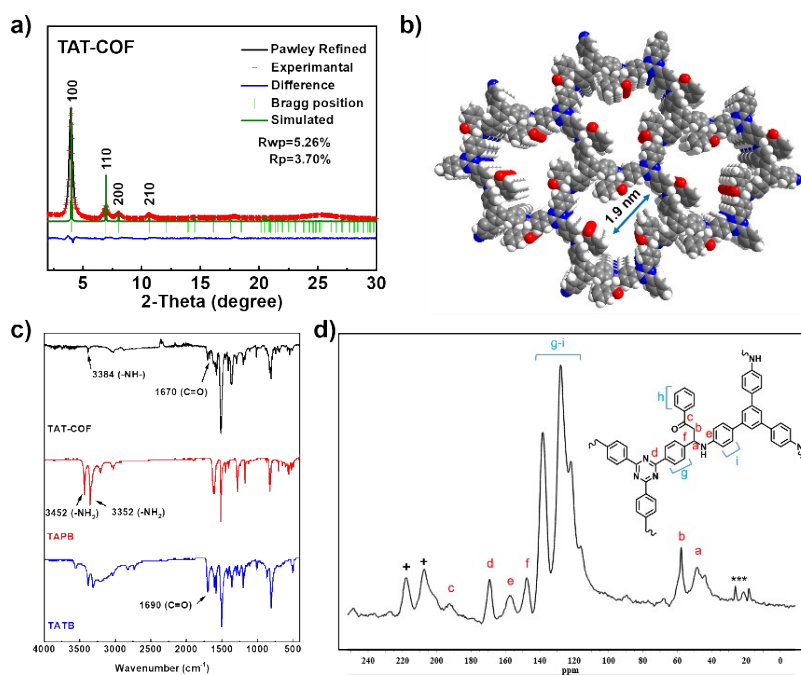



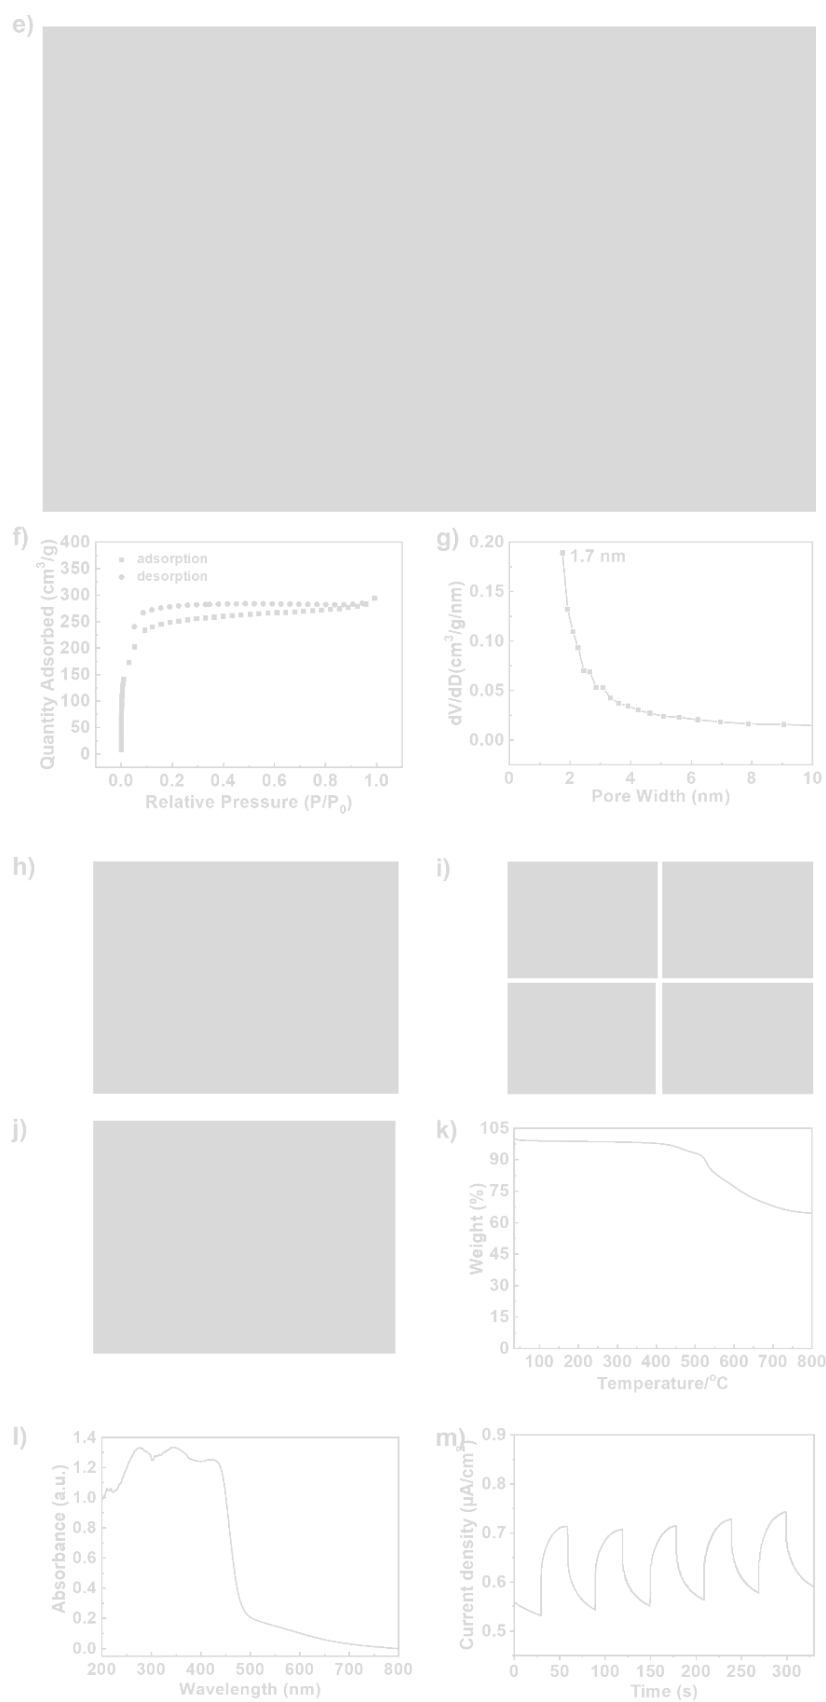

**Fig. S8** a) PXRD patterns of **TAT-COF** (AA stacking). b) The top and side views of **TAT-COF** (AA stacking). c) The FT-IR spectra of **TAT-COF** and its part monomers. The FT-IR spectra showed the characteristic peaks such as  $1670\text{ cm}^{-1}$  for  $[-\text{C}=\text{O}]$ ,  $3384\text{ cm}^{-1}$  for  $[-\text{N}-\text{H}]$  stretching vibrations, which

suggested the formation of **TAT-COF** through Mannich condensation reaction. d) The solid-state  $^{13}\text{C}$ -MAS NMR spectrum of **TAT-COF**,  $\delta$  (ppm): 193.0, 169.1, 157.6, 147.6, 138.3, 127.9, 121.9, 57.7, 48.8. The formation of **TAT-COF** was verified by the existence of the keto and aliphatic carbon in **TAT-COF** through the corresponding resonances at 193.0, 57.7, 48.8 ppm, respectively. e) The solid-state  $^{15}\text{N}$  NMR spectrum of **TAT-COF**,  $\delta$  (ppm): 328.9, 126.8, 52.3. The formation of **TAT-COF** was verified by the existence of the nitrogen in triazine and  $\beta$ -Ketamine in **TAT-COF** through the corresponding resonances at 328.9 and 126.8 ppm, respectively. f)  $\text{N}_2$  adsorption isotherms for **TAT-COF** at 77 K.  $\text{N}_2$  adsorption at 77 K revealed absorption amounts of **TAT-COF** was  $300.0 \text{ cm}^3/\text{g}$ , and its surface areas calculated on basis of the BET model were determined as  $783.0 \text{ m}^2/\text{g}$ . g) Pore size distribution curve of **TAT-COF**. Pore size distribution curves, calculated from nonlocal density functional theory (NLDFT) analysis, showed that the pore width of **TAT-COF** was centered at  $\sim 1.7 \text{ nm}$ . h) SEM image of **TAT-COF**. i) SEM-EDX images of **TAT-COF**. j) TEM image of the **TAT-COF**. k) TGA trace of **TAT-COF** measured under nitrogen flow with a heating rate  $10 \text{ }^\circ\text{C}/\text{min}$  up to  $800 \text{ }^\circ\text{C}$ , which can be stable up to  $420 \text{ }^\circ\text{C}$ . l) UV-Vis curve of the **TAT-COF** measured in solid state. **TAT-COF** exhibited three absorption peaks at around 280, 350 and 435 nm with an absorbance edge at 700 nm. m) Photocurrent response of **TAT-COF**.

**Table S4.** Fractional atomic coordinates for the unit cell of **TAT-COF**

**TAT-COF** AA stacking mode, space group:  $P3$

$$a = b = 25.4243 \text{ \AA}, c = 4.3467 \text{ \AA}$$

$$\alpha = \beta = 90^\circ, \gamma = 120^\circ$$

| Aotm | x       | y        | z        |
|------|---------|----------|----------|
| H1   | 0.48975 | 0.70392  | 0.30101  |
| H2   | 0.59498 | 0.78317  | 0.28471  |
| H3   | 0.44088 | 0.82814  | 0.7101   |
| H4   | 0.6099  | 0.95297  | 0.18858  |
| H5   | 0.75409 | 0.84047  | 0.13826  |
| H6   | 0.86081 | 0.87706  | 0.25261  |
| H7   | 0.86092 | 1.00698  | 0.89333  |
| H8   | 0.75538 | 0.97102  | 0.776    |
| H9   | 0.77883 | 1.03175  | 0.2368   |
| H10  | 0.88175 | 1.11525  | 0.30687  |
| H11  | 0.90254 | 1.20171  | 0.64649  |
| H12  | 0.81788 | 1.20355  | 0.91838  |
| H13  | 0.71334 | 1.11975  | 0.85808  |
| H14  | 1.11217 | 1.04714  | 0.61194  |
| C15  | 1.31876 | -0.39268 | -0.4908  |
| N16  | 1.37786 | -0.34782 | -0.49104 |
| C17  | 1.30301 | -0.45702 | -0.49693 |

|     |         |          |          |
|-----|---------|----------|----------|
| C18 | 1.24685 | -0.50174 | -0.61401 |
| C19 | 1.23241 | -0.56241 | -0.62692 |
| C20 | 1.27404 | -0.57995 | -0.52333 |
| C21 | 1.32935 | -0.53502 | -0.39629 |
| C22 | 1.34403 | -0.47427 | -0.38688 |
| C23 | 1.26    | -0.64586 | -0.52796 |
| C24 | 1.31004 | -0.65305 | -0.69691 |
| N25 | 1.20054 | -0.68668 | -0.66814 |
| C26 | 1.34471 | -0.67227 | -0.48633 |
| C27 | 1.33176 | -0.73635 | -0.45854 |
| O28 | 1.38629 | -0.63273 | -0.33691 |
| C29 | 1.28312 | -0.78524 | -0.61441 |
| C30 | 1.27138 | -0.8447  | -0.57475 |
| C31 | 1.30836 | -0.85645 | -0.38367 |
| C32 | 1.35712 | -0.80872 | -0.23098 |
| C33 | 1.36868 | -0.74923 | -0.26686 |
| C34 | 1.15694 | -0.74617 | -0.55593 |
| C35 | 1.09918 | -0.77675 | -0.69146 |
| C36 | 1.05898 | -0.83775 | -0.62448 |
| C37 | 1.07582 | -0.86956 | -0.41956 |
| C38 | 1.13225 | -0.83804 | -0.27056 |
| C39 | 1.17208 | -0.7769  | -0.33571 |
| C40 | 1.0369  | -0.93622 | -0.38171 |
| C41 | 1.06323 | -0.97338 | -0.37908 |
| H42 | 1.25852 | -0.65776 | -0.28413 |
| H43 | 1.29059 | -0.68573 | -0.88715 |
| H44 | 1.1919  | -0.67487 | -0.88483 |
| H45 | 1.36159 | -0.54683 | -0.30465 |

## 12. Reference

1. P. F. Wei, M. Z. Qi, Z. P. Wang, S. Y. Ding, W. Yu, Q. Liu, L. K. Wang, H. Z. Wang, W. K. An, W. Wang, *J. Am. Chem. Soc.*, 2018, **140**, 4623-4631.
2. D. Meng, J. Xue, Y. F. Zhang, T. J. Liu, C. C. Chen, W. J. Song, J. C. Zhao, *Catal. Sci. Technol.*, 2023, **13**, 1518-1526.

3. Z. J. Wang, R. Li, K. Landfester, K. A. Zhang, *Polymer.*, 2017, **126**, 291-295.
4. J. Luo, X. Zhang, J. Zhang, *ACS Catal.*, 2015, **5**, 2250-2254.
5. X.-L. Yan, H. Liu, Y.-S. Li, W.-B. Chen, T. Zhang, Z.-Q. Zhao, G.-L. Xing, L. Chen, *Macromolecules.*, 2019, **52**, 7977-7983.
6. S.-F. Liu, Z.-Q. Liu, Q. Su, Q.-L. Wu, *Micropor. Mesopor. Mater.*, 2022, **333**, 111737.
7. G.-B. Wang, Y.-J. Wang, J.-L. Kan, K.-H. Xie, H.-P. Xu, F. Zhao, M.-C. Wang, Y. Geng and Y.-B. Dong, *J. Am. Chem. Soc.*, 2023, **145**, 4951–4956.
